# Supplementary material
Source: PubMed Central journal article supplement (PMC2852333)
Supplement: f-66-00413-sup1.pdf [file f-66-00413-sup1.pdf]

**Supplementary Table 1. Crystallization conditions for AgaD\_cat identified from the initial screening.**

| Condition | Salt                       | Buffer                  | pH  | Precipitant      |
|-----------|----------------------------|-------------------------|-----|------------------|
| JCSG+: 9  | 0.2 M ammonium chloride    | None                    | 6.3 | 20% PEG 3350     |
| JCSG+: 25 | 0.2 M sodium chloride      | 0.1 M phosphate/citrate | 4.2 | 20% PEG 8000     |
| JCSG+: 60 | None                       | 0.1 M imidazole         | 8.0 | 10% PEG 8000     |
| JCSG+: 95 | 0.2 M magnesium chloride   | 0.1 M bis-tris          | 7.5 | 25% PEG 3350     |
| PACT: 1   | None                       | 0.1 M SPG               | 4.0 | 25% PEG 1500     |
| PACT: 22  | 0.2 M magnesium chloride   | 0.1 M MES               | 6.0 | 20% PEG 6000     |
| PACT: 48  | 0.002 M zinc chloride      | 0.1 M Tris              | 8   | 20% PEG 6000     |
| PEG I: 6  | None                       | 0.1 M sodium acetate    | 4.6 | 25% PEG 2000 MME |
| PEG I: 25 | None                       | 0.1 M sodium acetate    | 4.6 | 25% PEG 3000     |
| PEG I: 26 | None                       | 0.1 M sodium acetate    | 4.6 | 25% PEG 4000     |
| PEG I: 27 | None                       | 0.1 M sodium acetate    | 4.6 | 25% PEG 6000     |
| PEG I: 28 | None                       | 0.1 M sodium acetate    | 4.6 | 25% PEG 8000     |
| PEG I: 49 | 0.2 M sodium fluoride      | None                    |     | 20% PEG 3350     |
| PEG I: 53 | 0.2 M magnesium chloride   | None                    |     | 20% PEG 3350     |
| PEG I: 80 | 0.2 M magnesium sulfate    | None                    |     | 20% PEG 3350     |
| PEG I: 87 | 0.2 M sodium phosphate     | None                    |     | 20% PEG 3350     |
| PEG I: 91 | 0.2 M ammonium phosphate   | None                    |     | 20% PEG 3350     |
| PEG I: 96 | 0.18 M triammonium citrate | None                    |     | 20% PEG 3350     |
